# Supplementary material for: Local administration of liposomal-based Srpx2 gene therapy reverses pulmonary fibrosis by blockading fibroblast-to-myofibroblast transition
Source: Theranostics. 2021 May 13;11(14):7110–25. doi: 10.7150/thno.61085 (PMC8171094; doi:10.7150/thno.61085)

**Supplemental Figure 1.** Representative images of immunostaining of FIBRONECTIN, COL1A1 and  $\alpha$ -SMA in HPFs. The nuclei were stained blue by DAPI, and the images were taken under original magnification  $\times 400$ . The data are represented as the mean  $\pm$  SEM of three independent experiments. \*,  $p < 0.05$ ; \*\*,  $p < 0.01$ ; \*\*\*,  $p < 0.001$ .

**Supplemental Figure 2. A:** Representative results for Transwell assay in *SRPX2* siRNA or Scrambled siRNA treated HPFs. **B:** Representative results for EdU staining in *SRPX2* siRNA or Scrambled siRNA treated HPFs. The data are represented as the mean  $\pm$  SEM of three independent experiments. \*,  $p < 0.05$ ; \*\*\*,  $p < 0.001$ .

**Supplemental Figure 3. Characteristics of the liposomes. A:** The hydrodynamic diameter, PDI and zeta potential of the liposomes (blank or siRNA-loaded) were measured by DLS. SiRNA entrapment efficiency was measured by RiboGreen assay. **B:** Representative TEM image of siRNA-loaded liposomes. **C:** Hydrodynamic diameter distribution of siRNA-loaded liposomes. **D:** Colloid stability of siRNA-loaded liposomes in PBS.

**Supplemental Figure 4. A:** CCK-8 assay to check the effect of liposomes on the viability of fibroblasts. **B:** Representative results of TUNEL assay in the mice lung sections. **C:** Histological analysis of lung, heart, liver, spleen, kidney, and intestine in mice after induction with liposomes. Representative images for H&E. Images were captured at  $\times 400$  magnification. **D:** liver, renal, and cardiac function of mice after induction with liposomes. Seven mice were included in each group. The data are represented as the mean  $\pm$  SEM. ALT: Alanine aminotransferase; AST: Aspartate aminotransferase; BUN: Blood Urea Nitrogen; CR: Creatinine; CK: Creatine Kinase.

**Supplemental Figure 5.** RT-PCR analysis of *Fibronectin*, *Col1a1*,  $\alpha$ -SMA and *Srpx2* expression in mice after BLM induction with Scrambled or *Srpx2* siRNA-loaded liposomes. Six mice were included in each study group. The data are represented as the mean  $\pm$  SEM. \*,  $p < 0.05$ ; \*\*,  $p < 0.01$ ; \*\*\*,  $p < 0.001$ .

**Supplemental Figure 6. A:** Western blot analysis of Arginase 1 (alternative activated macrophages marker) expression in mice after BLM induction with Scrambled or *Srpx2* siRNA-loaded liposomes. **B:** Western blot analysis of *Srpx2* expression in macrophages following IL-4 induction. Six mice were included in each study group. The data are represented as the mean  $\pm$  SEM.

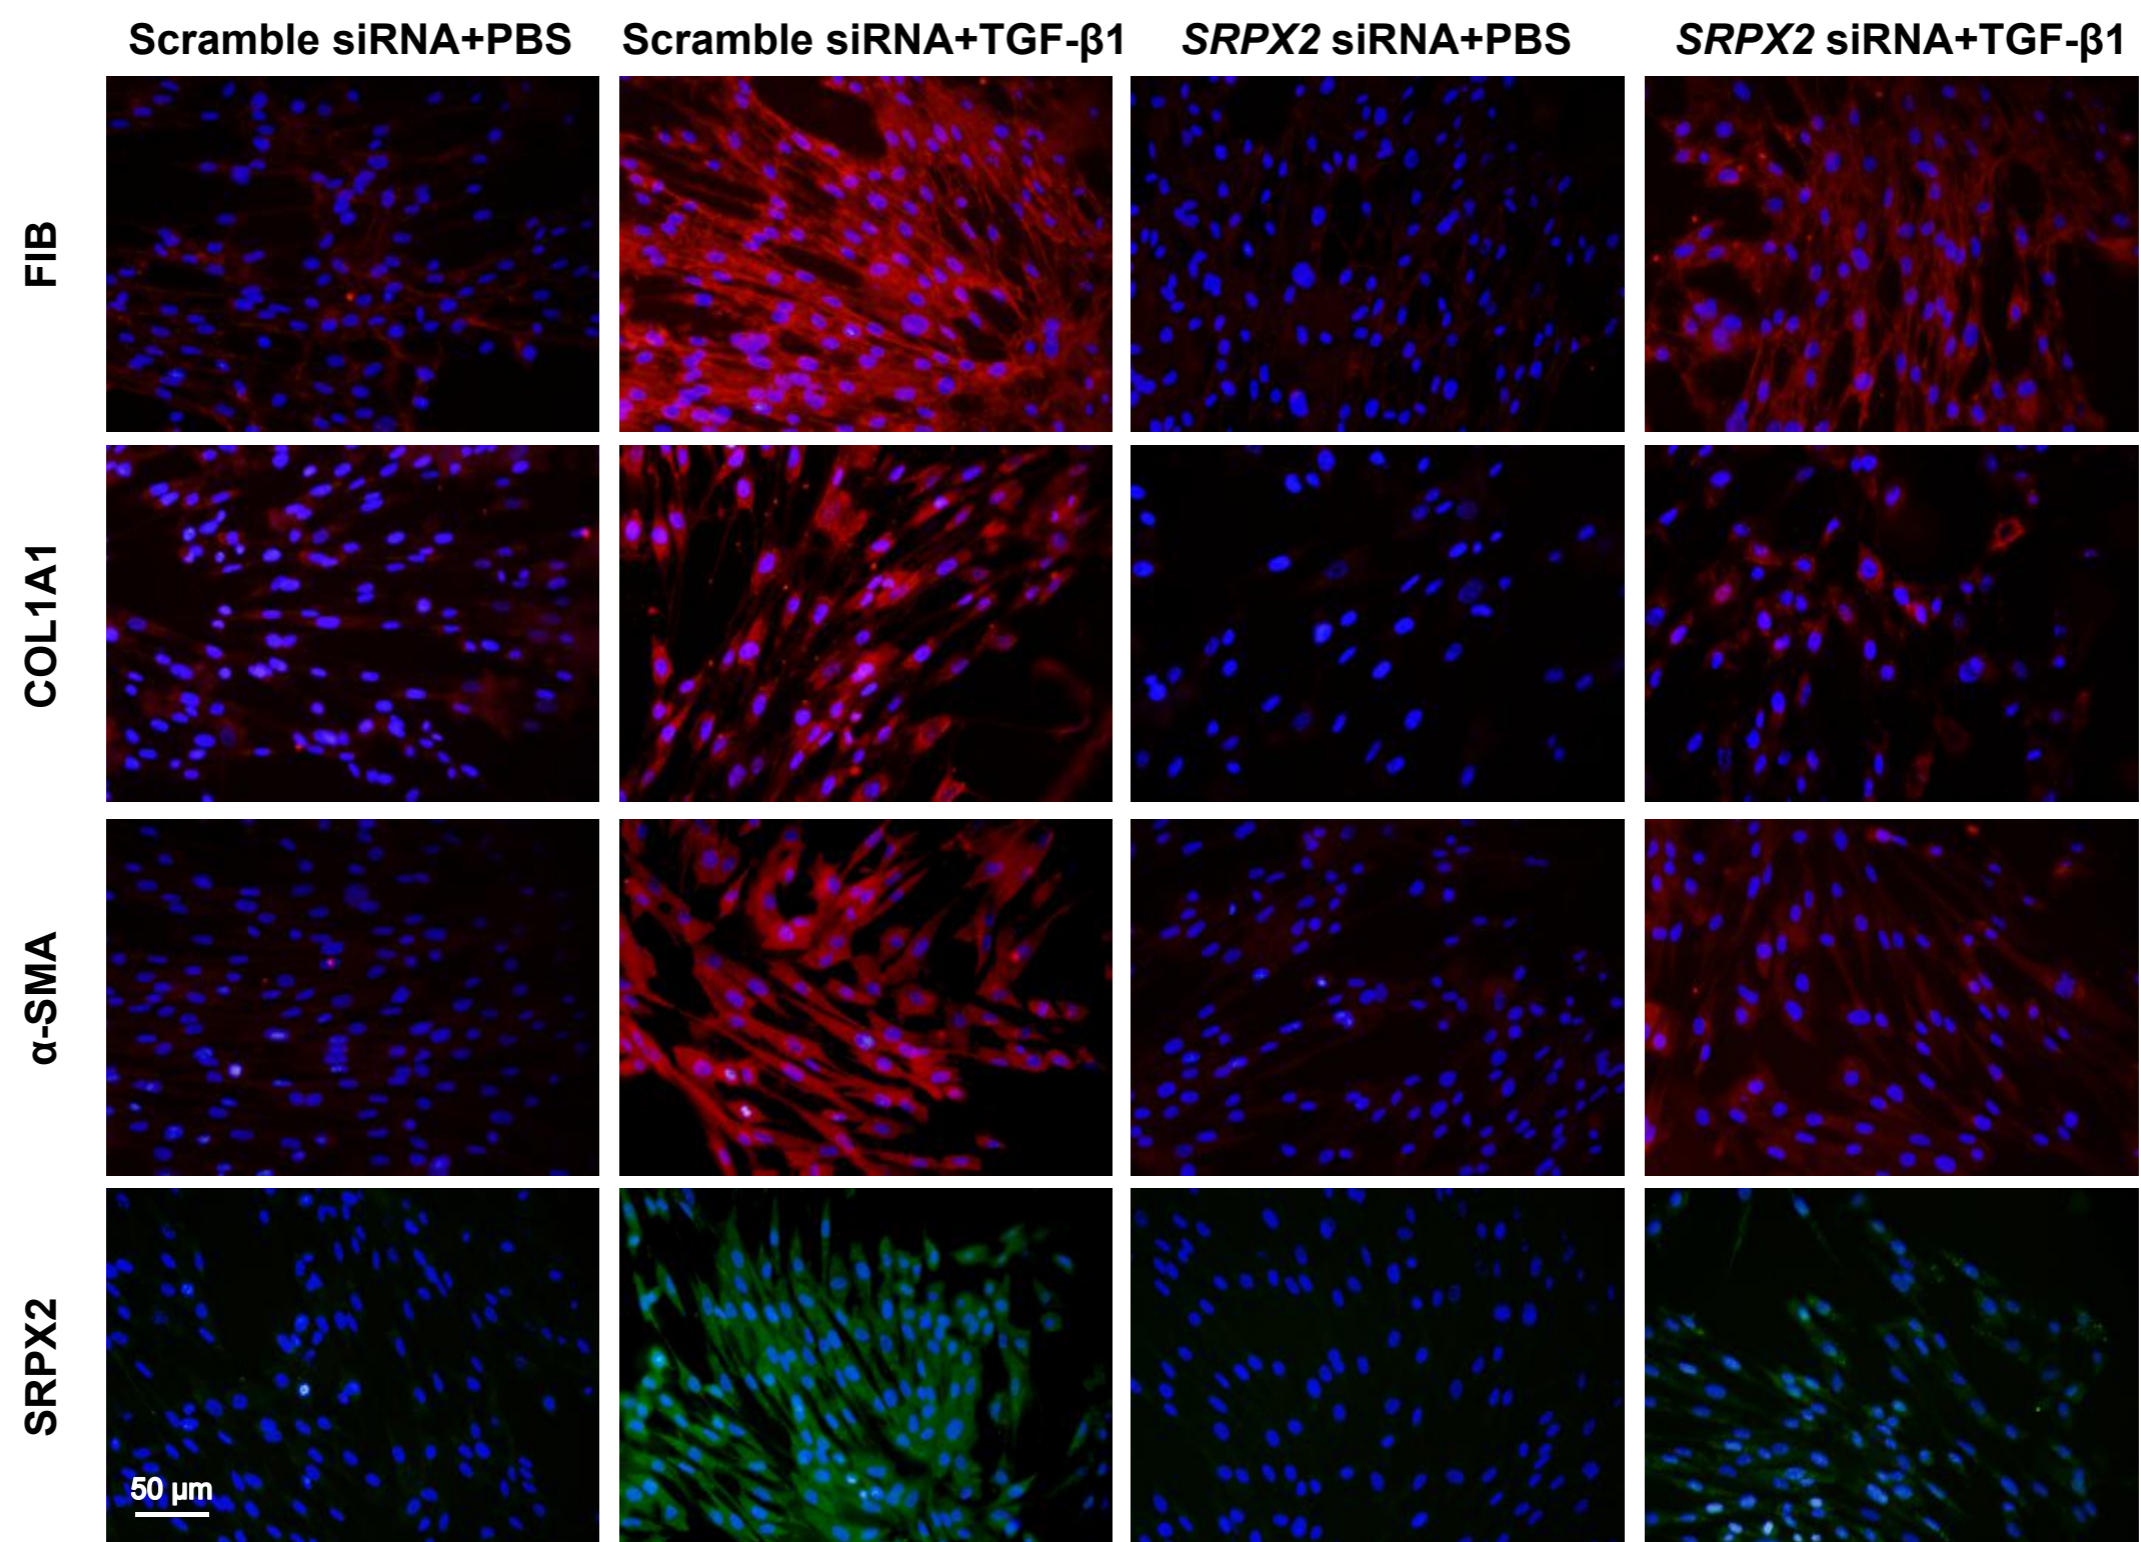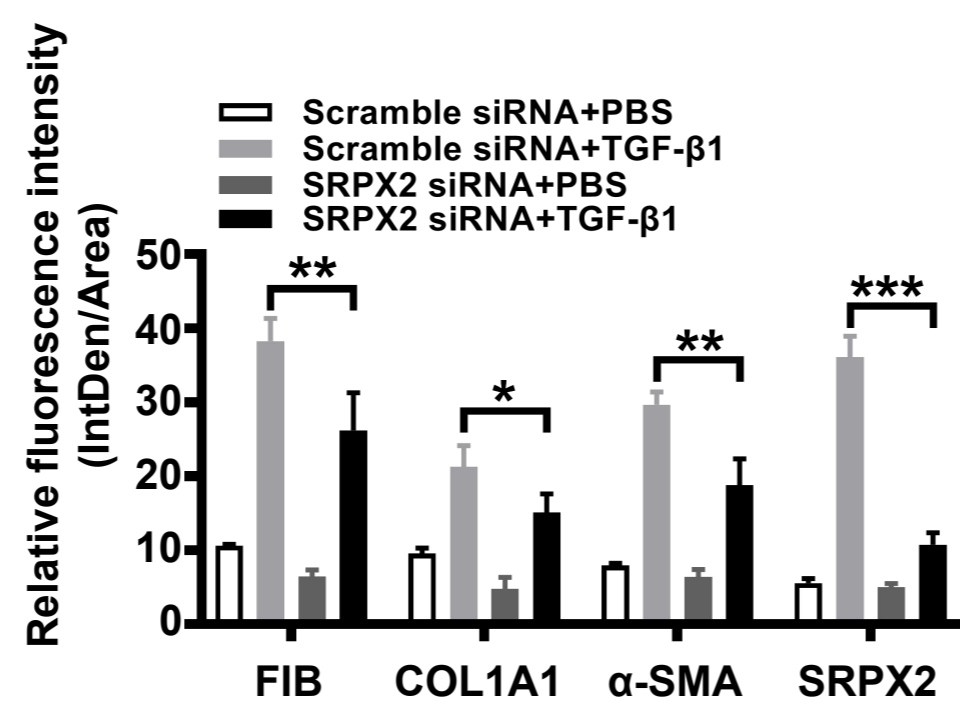

**A**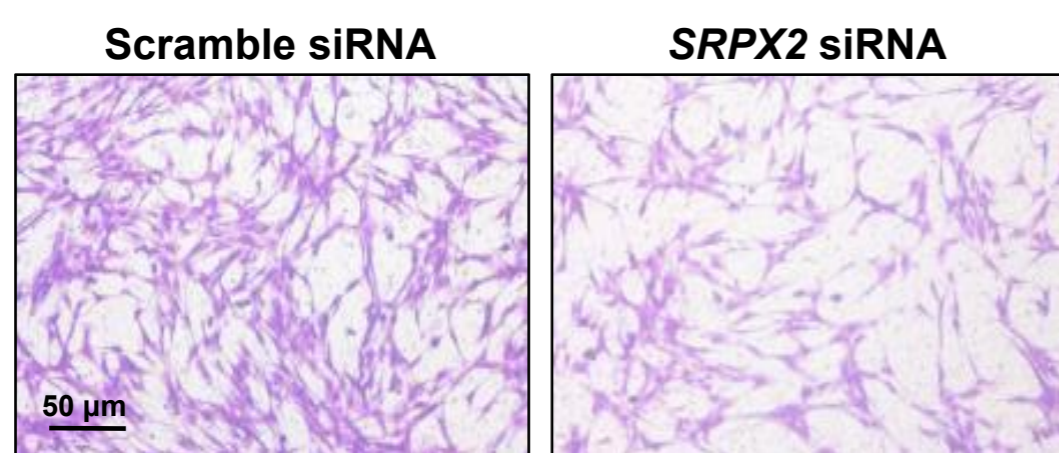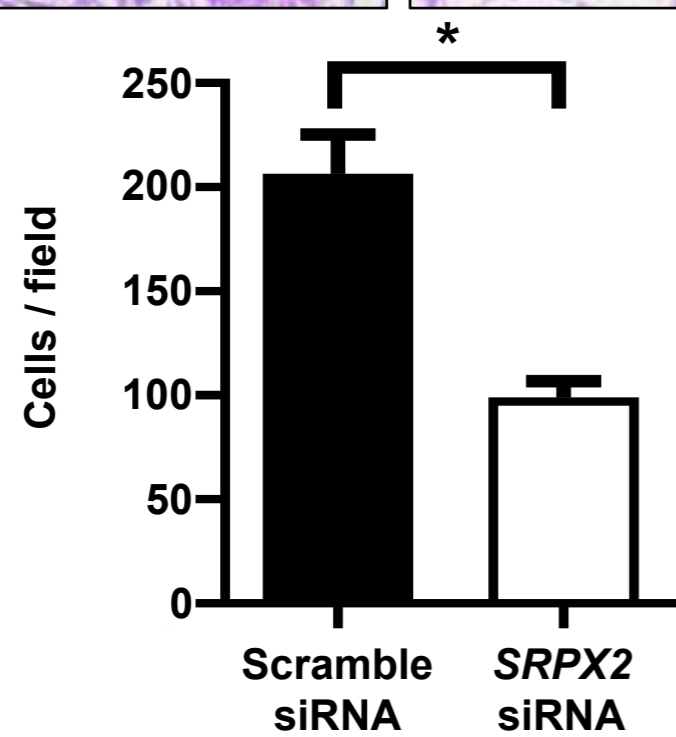**B**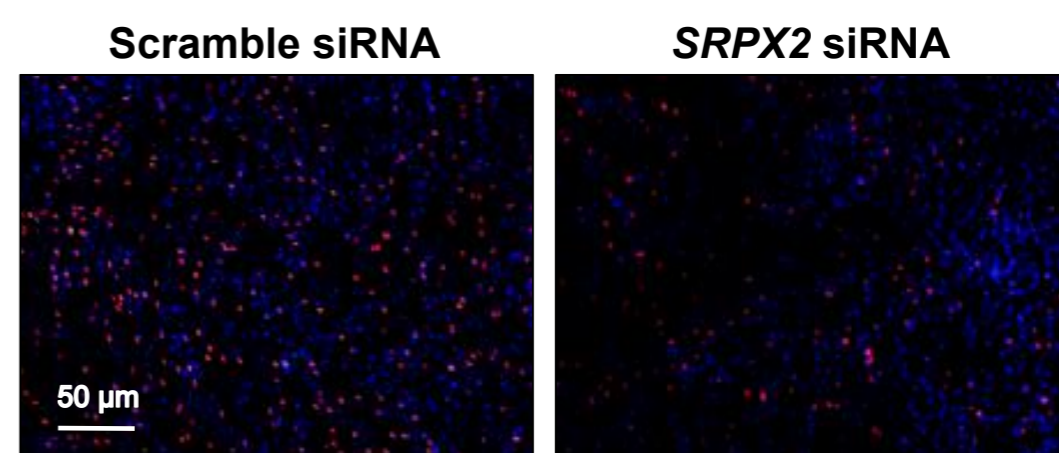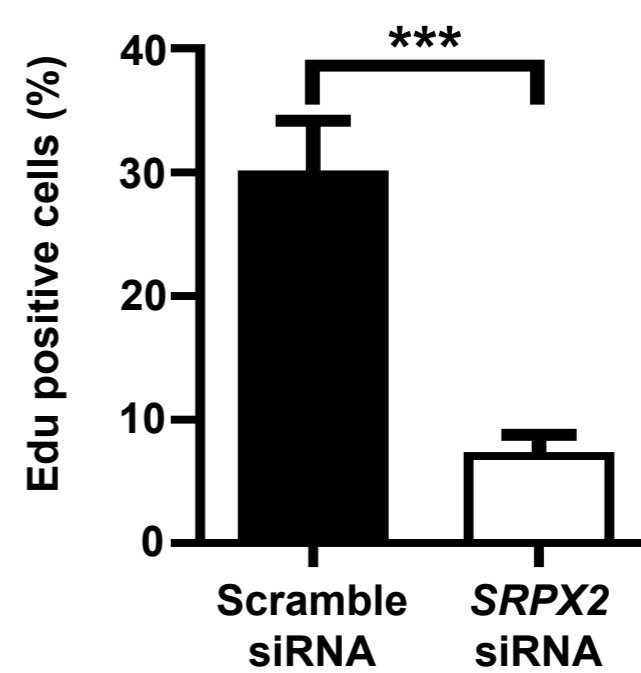

**A**

|                            | Blank liposome | siRNA loaded liposome |
|----------------------------|----------------|-----------------------|
| Hydrodynamic diameter (nm) | 115            | 102                   |
| PDI                        | 0.18           | 0.07                  |
| Zeta-potential (mv)        | 22.1           | 2.8                   |
| Entrapment efficiency (%)  | /              | >95                   |

**B**

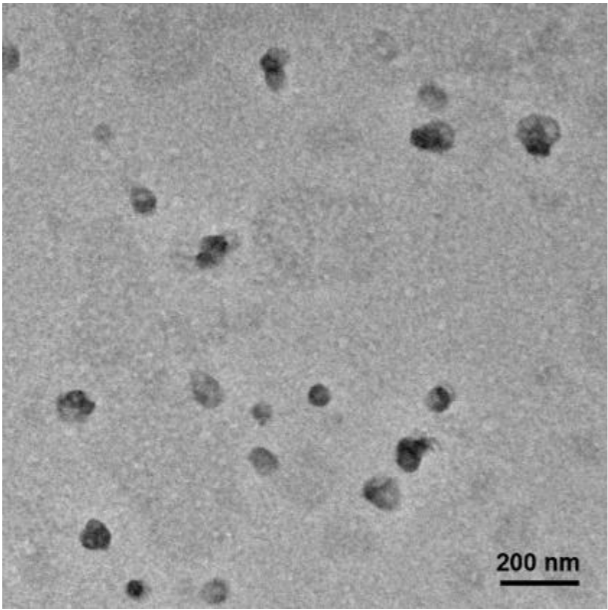

**C**

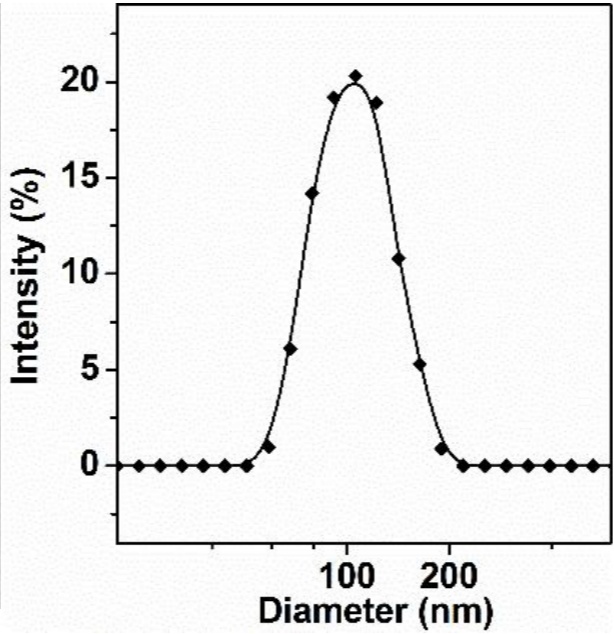

**D**

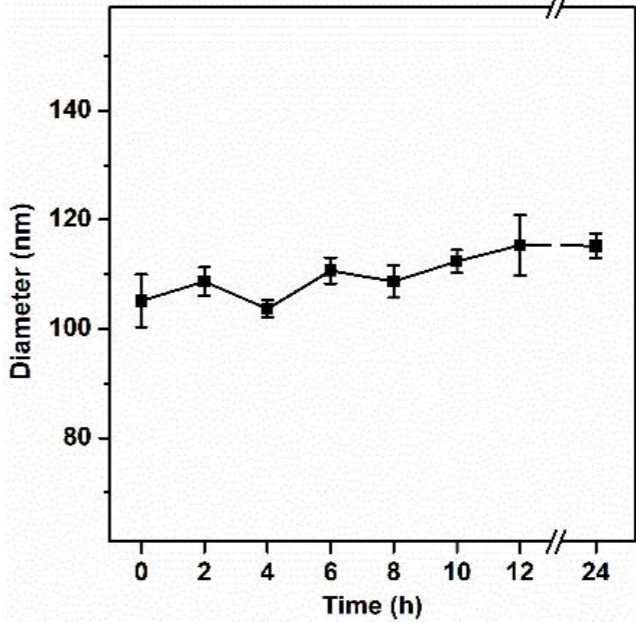

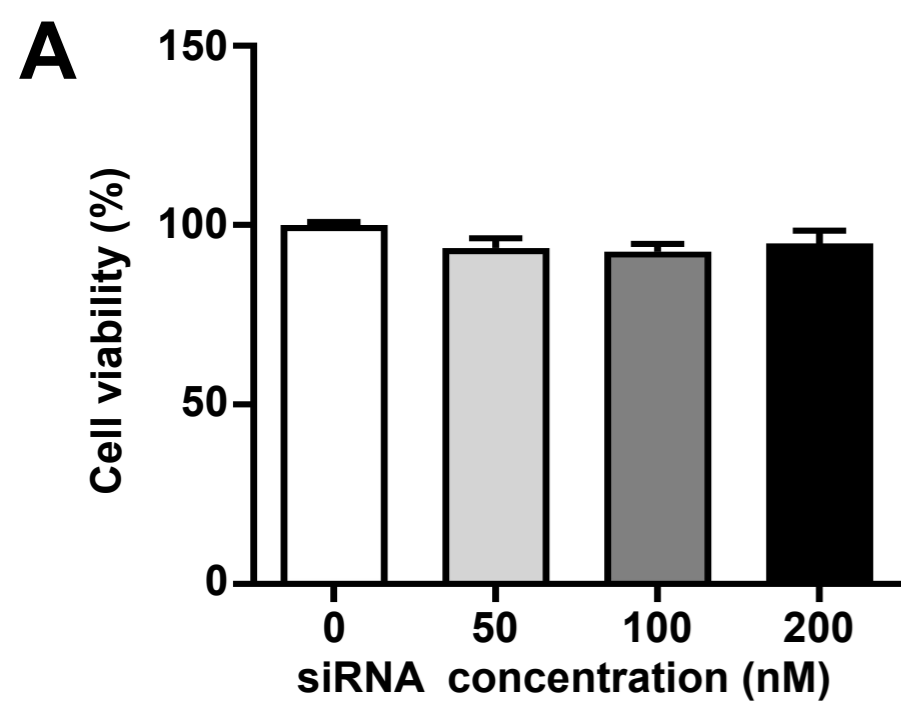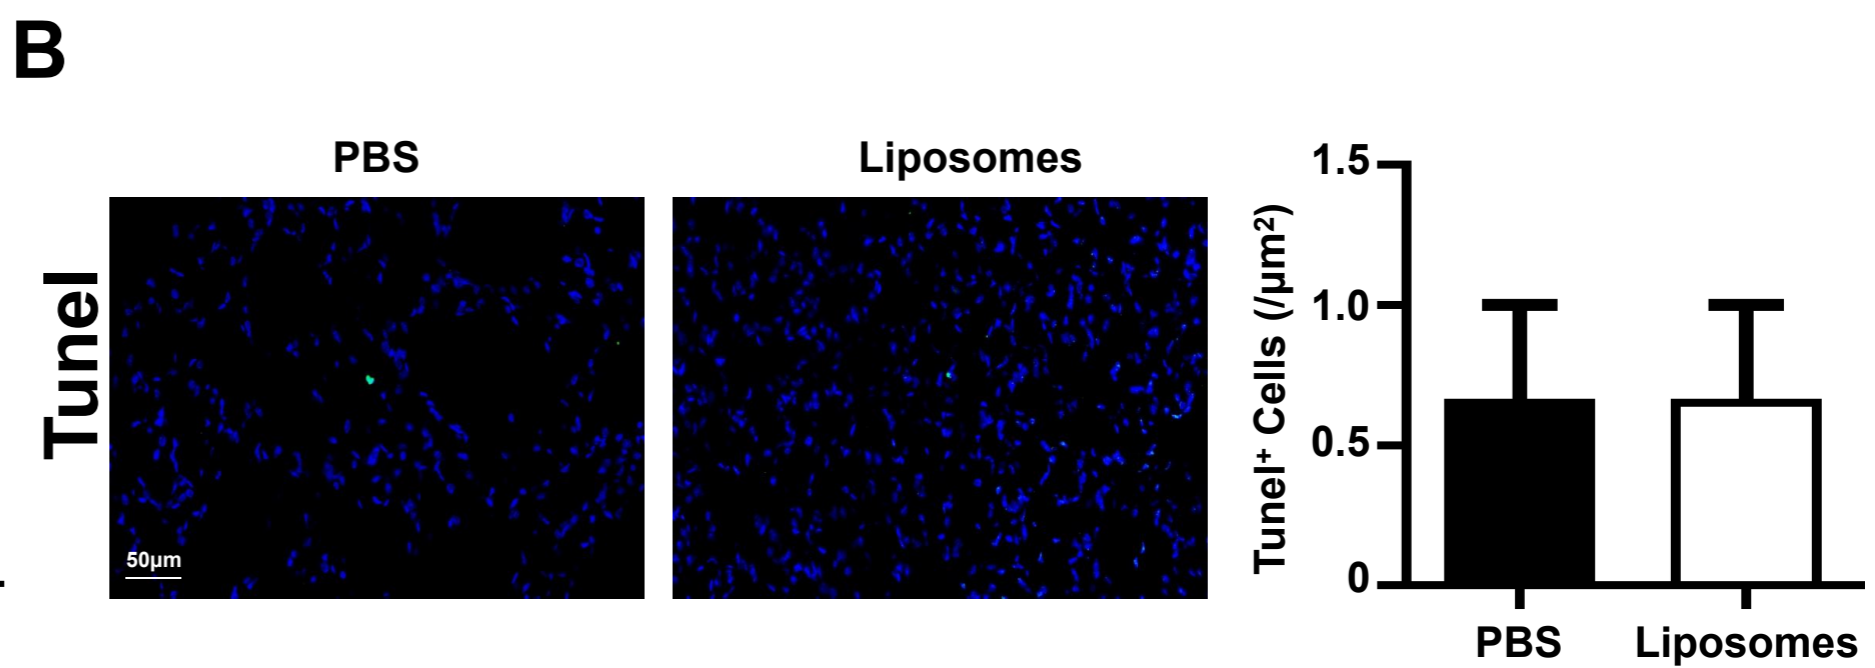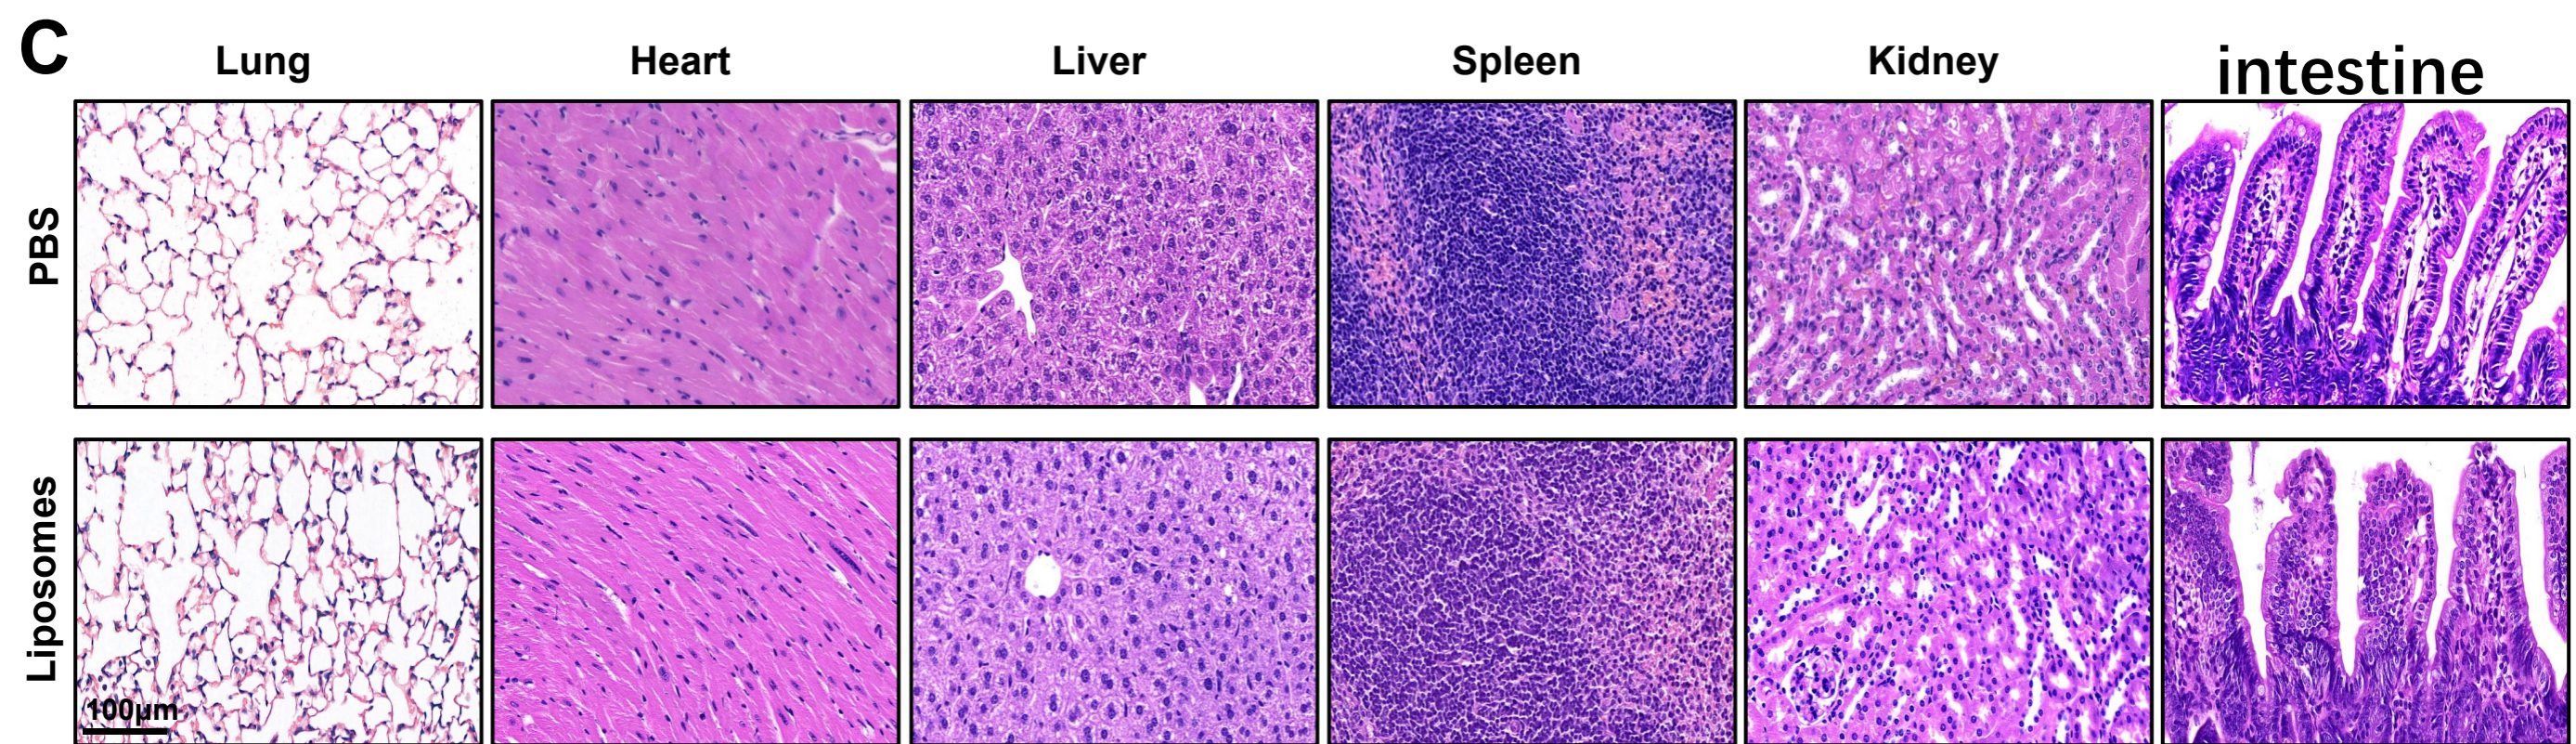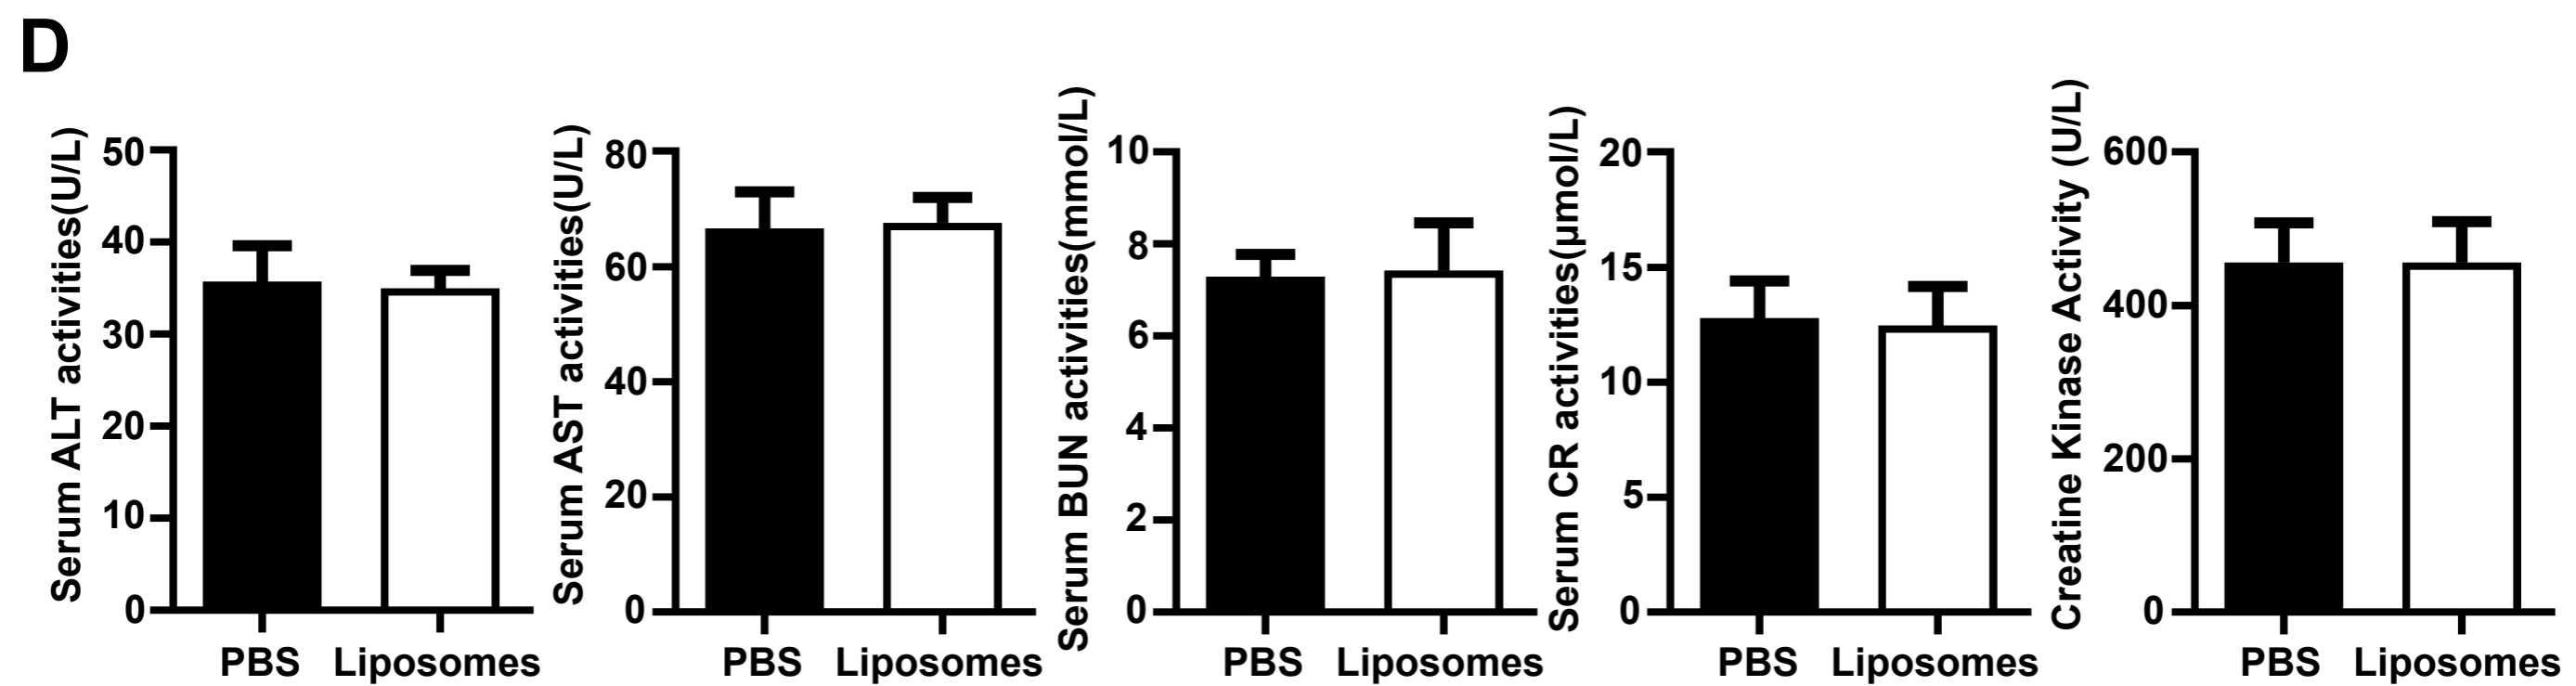

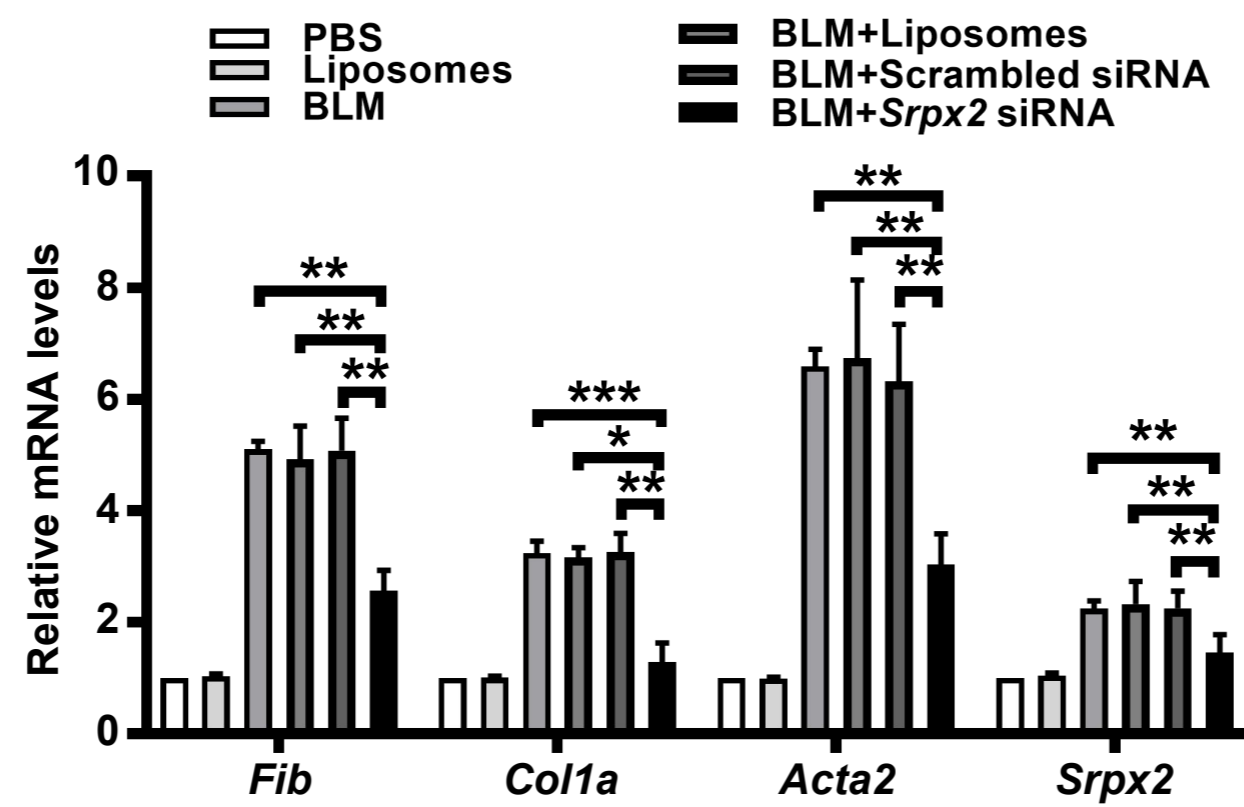

**A**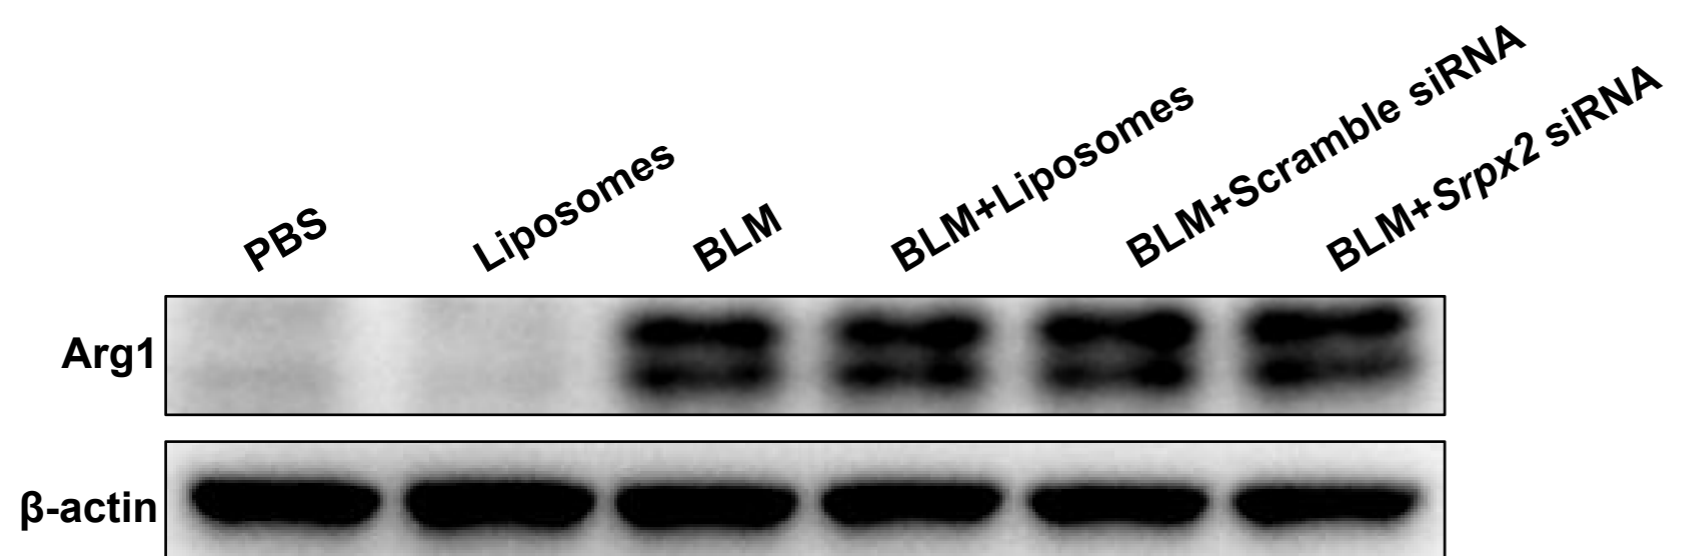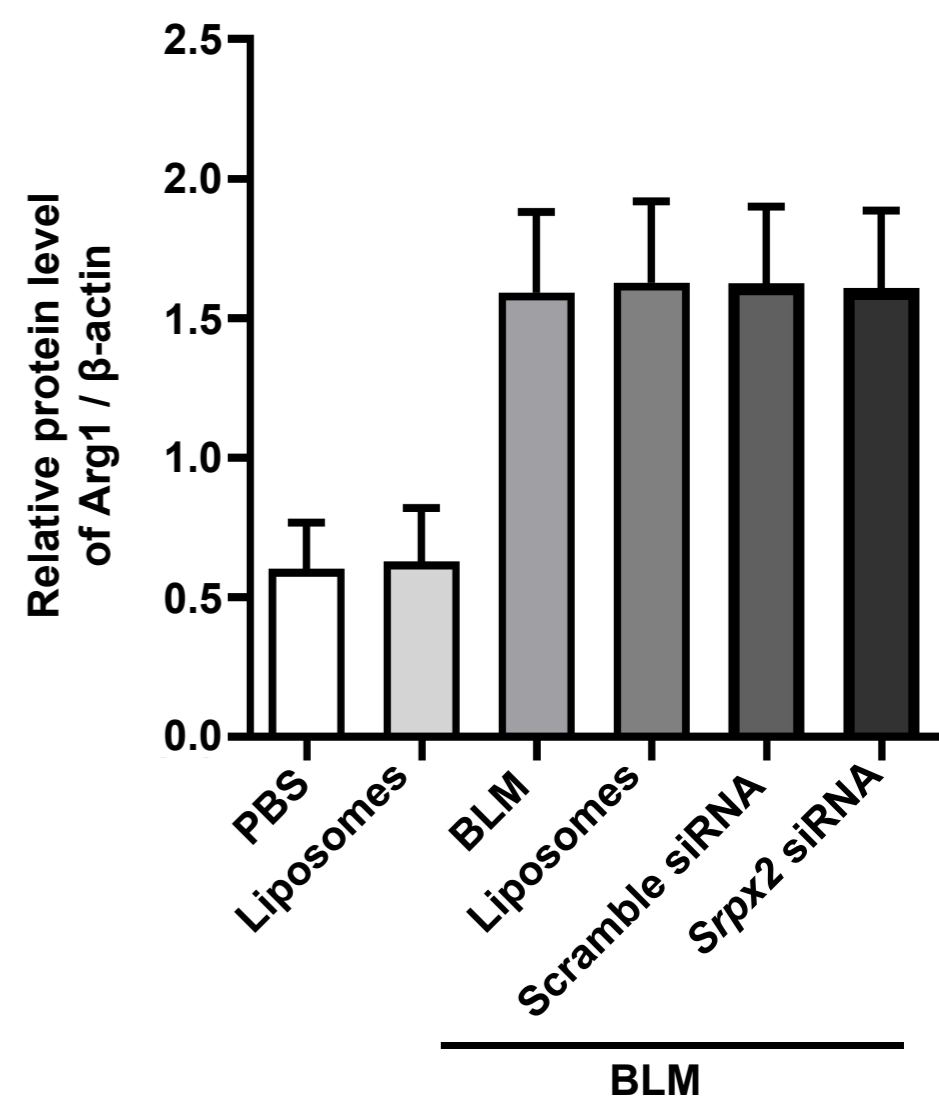**B**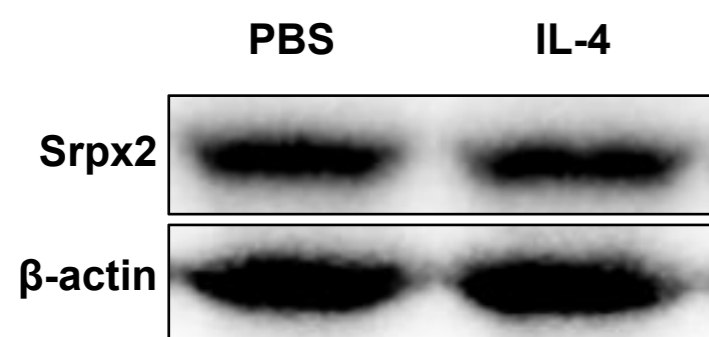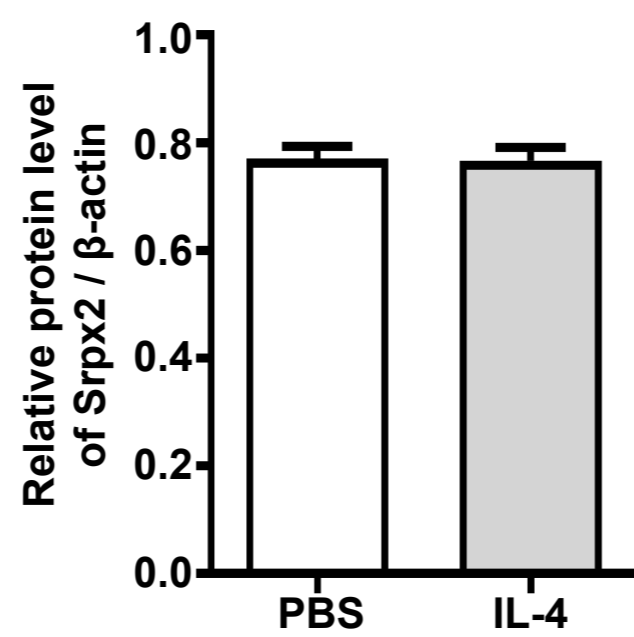

Supplement: Supplementary file 1 — Supplementary figures. [file thnov11p7110s1.pdf]
